# Supplementary material for: Implementation of an intermediate-complexity snow-physics scheme (ISBA-Explicit Snow) into a sea ice model (SI 3 ): 1D thermodynamic coupling and validation
Source: Copernicus journal article supplement (doi:10.5194/gmd-18-6885-2025), 2025-10-07
Supplement: Supplementary file 1 [file gmd-18-6885-2025-supplement.pdf]

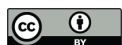

*Supplement of*

**Implementation of an intermediate-complexity snow-physics scheme (ISBA-Explicit Snow) into a sea ice model (SI<sup>3</sup>): 1D thermodynamic coupling and validation**

**Théo Brivoal et al.**

*Correspondence to:* Théo Brivoal (theo.brivoal@meteo.fr)

The copyright of individual parts of the supplement might differ from the article licence.

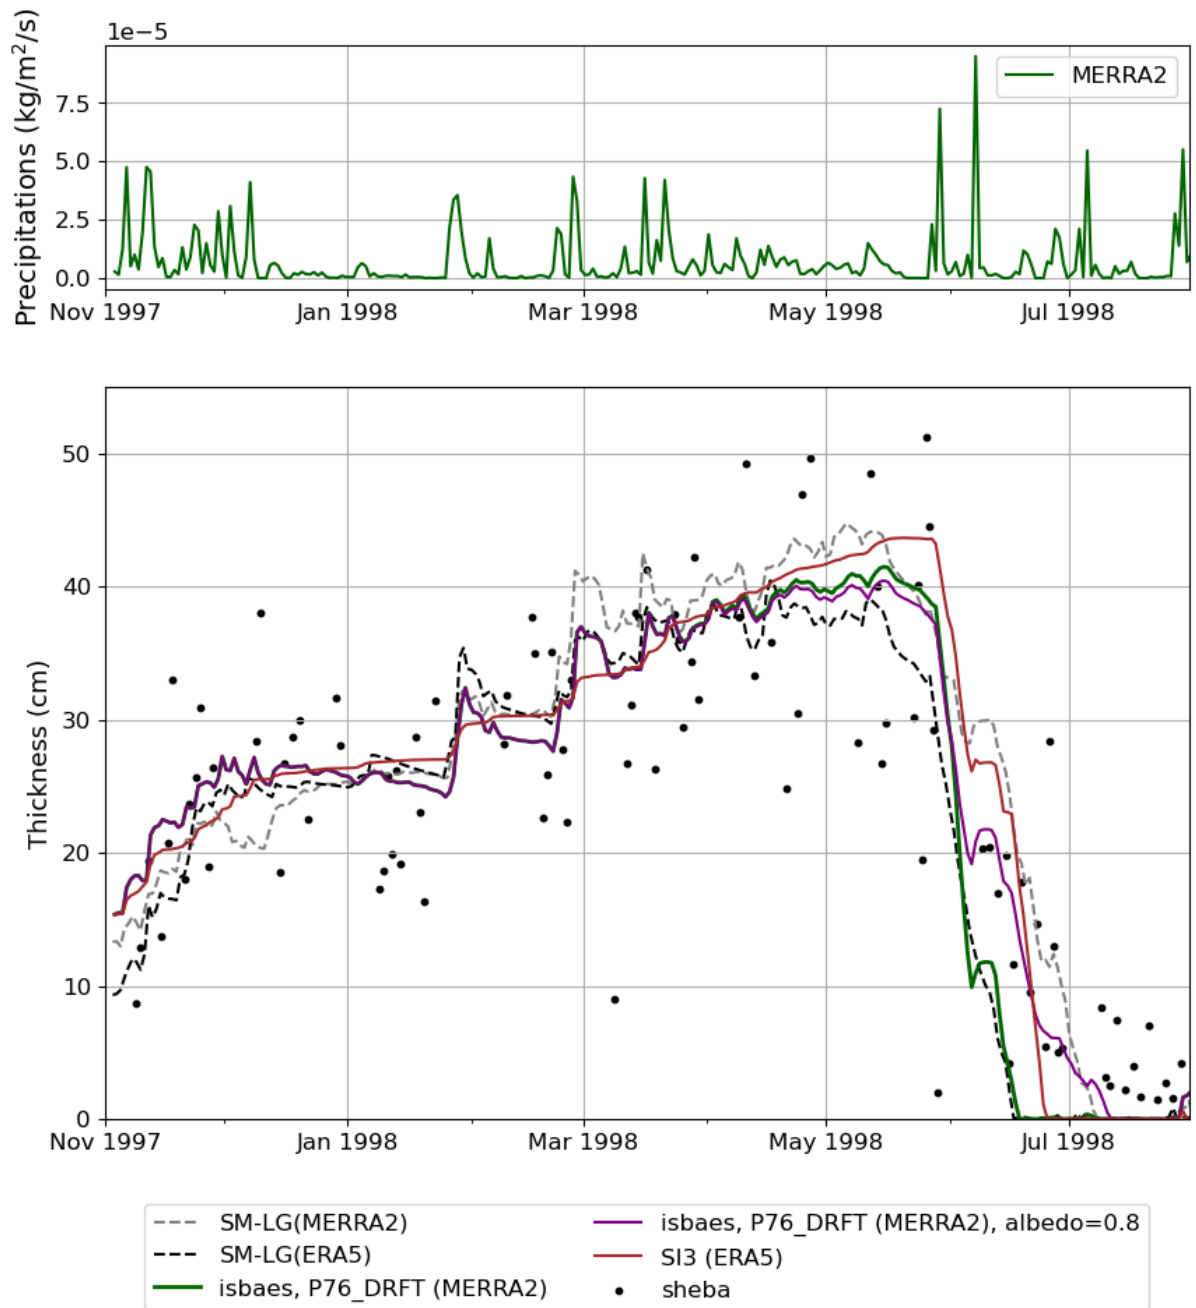

**Figure S1: Observed (black dots) and simulated (lines) snow thickness at SHEBA during the November 1997 - September 1998 period. The purple line represents the snow thickness for a simulation using the P76\_DRFT configuration, but for which the albedo is fixed to 0.8. This simulation is more consistent with SM-LG(MERRA2) during the melt period.**
